# Supplementary material for: Identification and Application of Two Promising Peptide Ligands for the Immunodetection of Imidacloprid Residue
Source: MDPI journal article supplement (doi:10.3390/foods11203163), 2022-10-11
Supplement: s1 [file s1]

## **Supporting Information**

### **Identification and Application of Two Promising Peptide Ligands for the Immunodetection of Imidacloprid Residue**

Tianyang You<sup>1,2,†</sup>, Yuan Ding<sup>1,2,†</sup>, Yue Huang<sup>1,2</sup>, Yang Lu<sup>1,2</sup>, Minghua Wang<sup>1,2</sup>, Xiude Hua<sup>1,2,\*</sup>

<sup>1</sup> College of Plant Protection, Nanjing Agricultural University, Nanjing 210095, China

<sup>2</sup> State & Local Joint Engineering Research Center of Green Pesticide Invention and Application, Nanjing 210095, China

\* Correspondence: huaxiude@njau.edu.cn; Tel./Fax: +86-25-84395479

† The authors contributed equally to this work

**Table S1.** Phage titer among panning.

| Rounds | Input (cfu/mL)       | Output (cfu/mL)   |                             |
|--------|----------------------|-------------------|-----------------------------|
|        |                      | Peptidomimetics   | Anti-immunocomplex peptides |
| 1      | $3.0 \times 10^{11}$ | $6.0 \times 10^5$ | $2.2 \times 10^5$           |
| 2      | $3.0 \times 10^{10}$ | $1.6 \times 10^8$ | $4.1 \times 10^5$           |
| 3      | $3.0 \times 10^{10}$ | $2.0 \times 10^8$ | $4.5 \times 10^7$           |

**Table S2.** Optimization of mAb concentrations and phage inputs in competitive P-ELISA.

| Clone name | Concentration of antibody<br>( $\mu\text{g/mL}$ ) | Input of phage particles<br>(pfu) | OD <sub>450</sub> |
|------------|---------------------------------------------------|-----------------------------------|-------------------|
| 1-9-G      | 2.5                                               | $1.56 \times 10^8$                | 1.0148            |
| 1-11-H     | 2.5                                               | $7.81 \times 10^7$                | 1.2772            |
| 1-10-F     | 2.5                                               | $1.95 \times 10^7$                | 1.3974            |
| 1-12-A     | 2.5                                               | $1.95 \times 10^7$                | 1.1289            |
| 1-9-H      | 2.5                                               | $3.91 \times 10^7$                | 1.2429            |
| 1-12-C     | 1.25                                              | $6.25 \times 10^8$                | 1.4145            |
| 1-10-H     | 2.5                                               | $1.95 \times 10^7$                | 1.2585            |

**Table S3.** Comparison of reported ELISAs for IMI.

| Methods                | IC <sub>50</sub> /SC <sub>50</sub><br>(ng/mL) | Detection range<br>(ng/mL) | References   |
|------------------------|-----------------------------------------------|----------------------------|--------------|
| Competitive P-ELISA    | 0.067                                         | 0.024-0.4                  | [9]          |
| Competitive P-ELISA    | 96                                            | 8.0-906                    | [27]         |
| Competitive ELISA      | 35                                            | Not shown                  | [19]         |
| Competitive ELISA      | 17.3                                          | 5-125                      | [20]         |
| Competitive ELISA      | 0.3                                           | 0.03-4.0                   | [21]         |
| Competitive ELISA      | 1.2                                           | Not shown                  | [22]         |
| Competitive ELISA      | 121.6                                         | Not shown                  | [23]         |
| Competitive ELISA      | 1.3                                           | Not shown                  | [24]         |
| Competitive P-ELISA    | 0.55                                          | 0.30-1.00                  | Present work |
| Noncompetitive P-ELISA | 0.35                                          | 0.15-0.8                   | Present work |

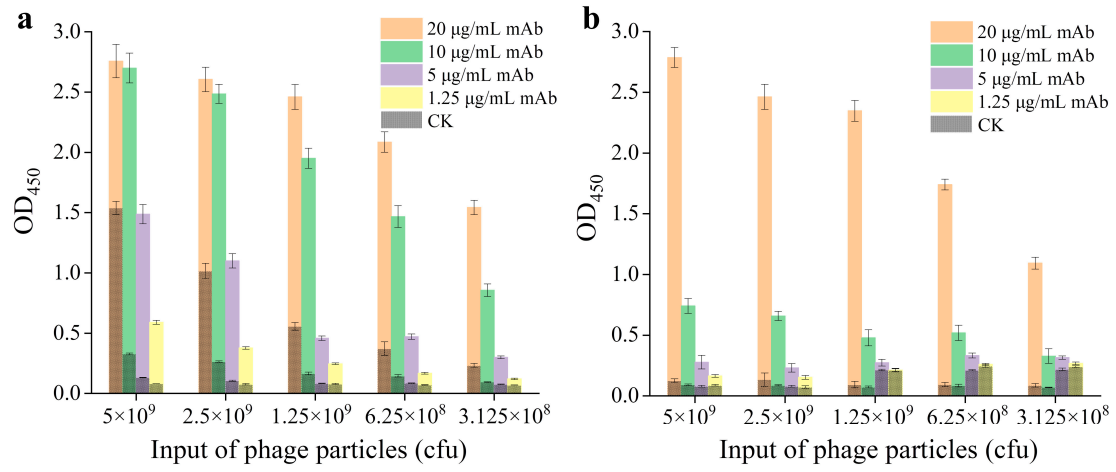

**Figure S1.** Optimization of mAb concentration and phage input in noncompetitive P-ELISA.

(a) Peptide 2-1-A. (b) Peptide 2-1-H.

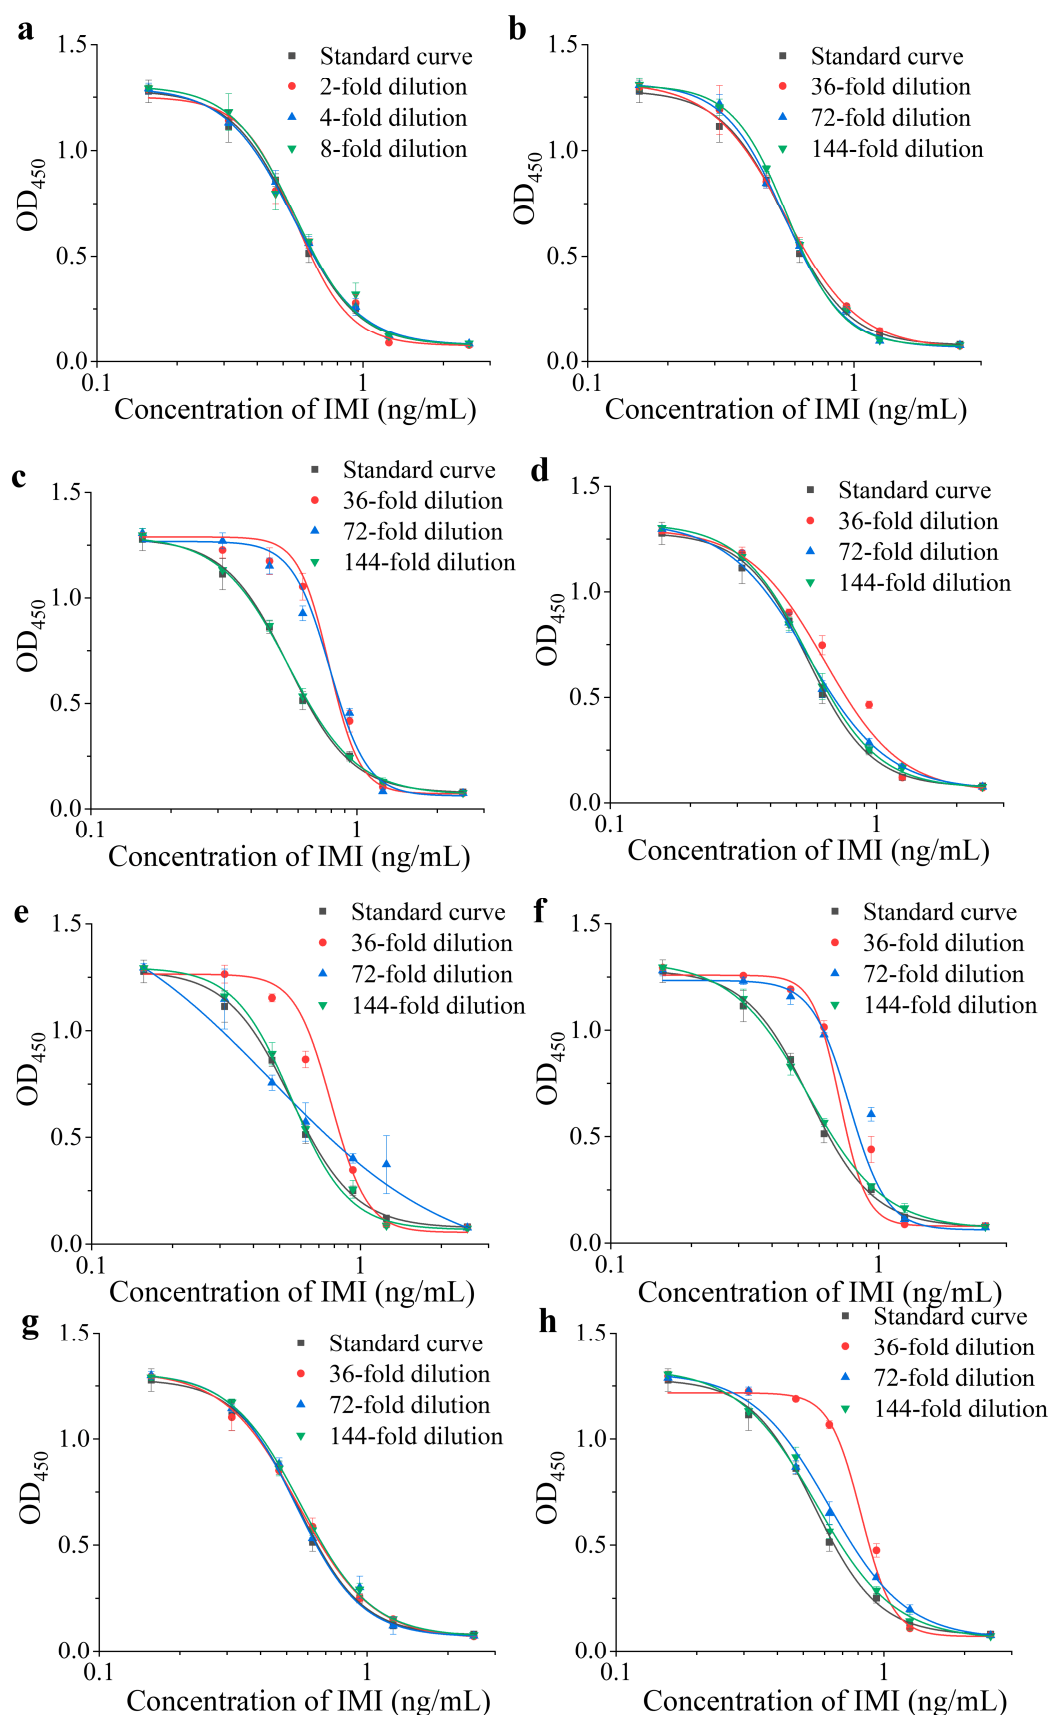

**Figure S2.** Matrix effects on competitive P-ELISA. (a) Paddy water. (b) soil. (c) wheat. (d) brown rice. (e) cabbage. (f) potato. (g) pear. (h) orange.

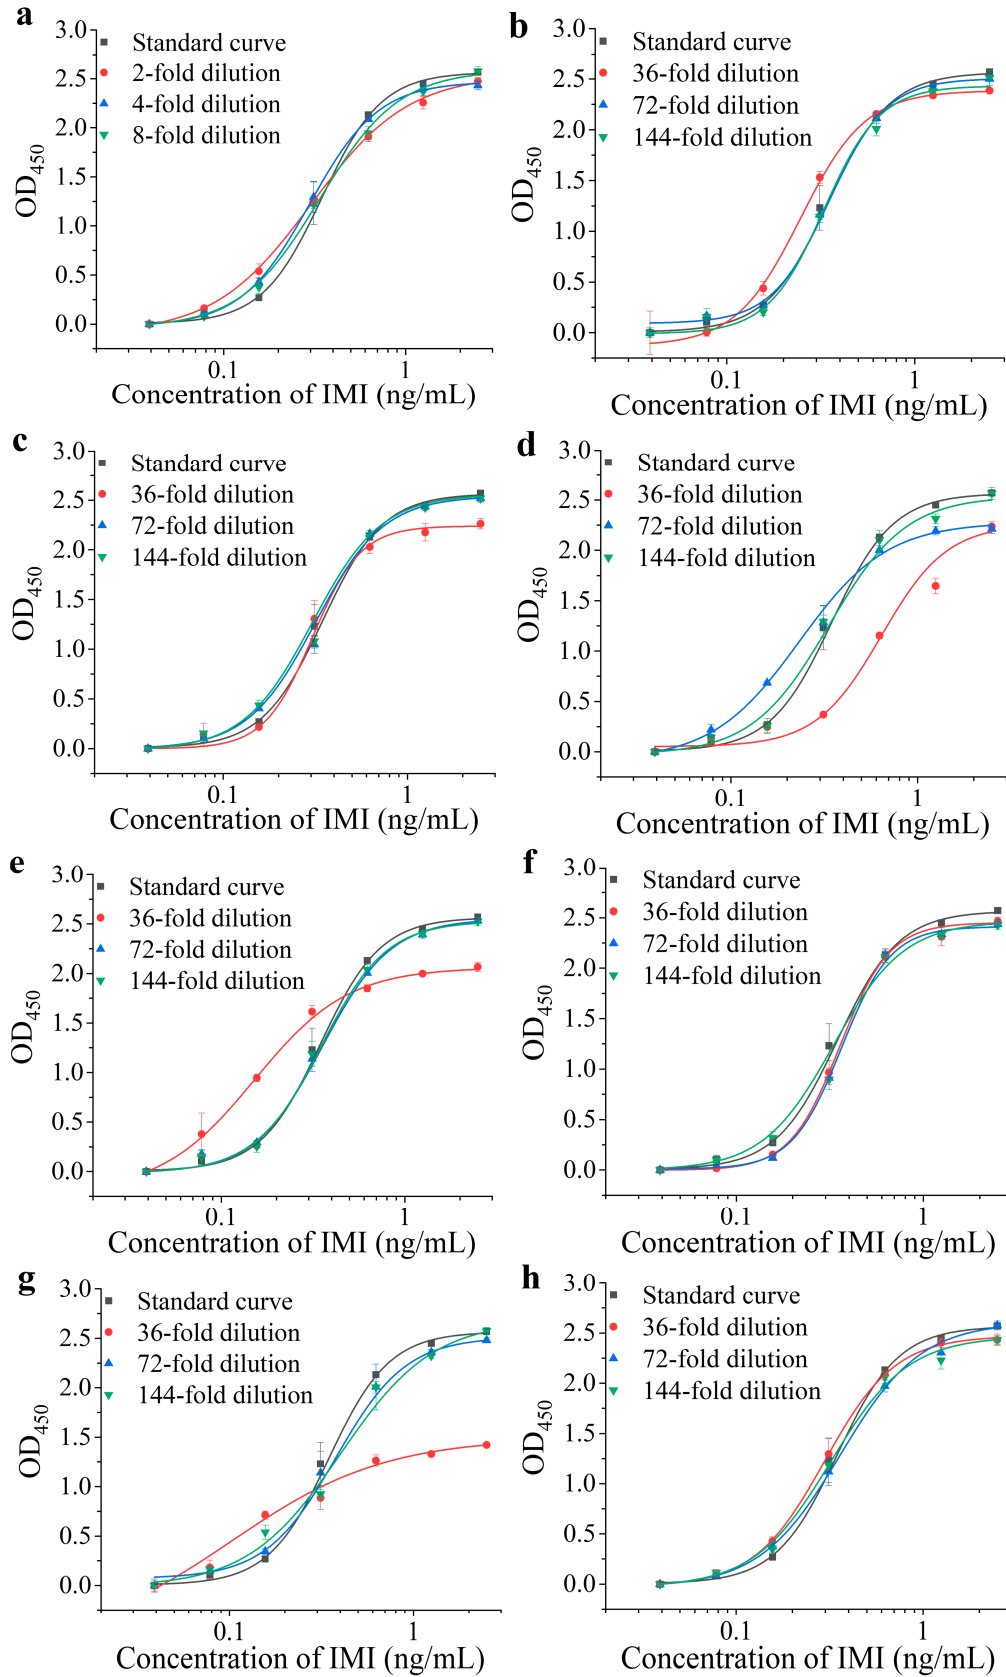

**Figure S3.** Matrix effects of noncompetitive P-ELISA. (a) Paddy water. (b) soil. (c) wheat. (d) brown rice. (e) cabbage. (f) potato. (g) pear. (h) orange.
